# Supplementary material for: Hsa-miR-323a-3p functions as a tumor suppressor and targets STAT3 in neuroblastoma cells
Source: Frontiers journal article supplement (doi:10.3389/fped.2023.1098999), 2023-03-24
Supplement: Data_Sheet_1.pdf [file Data_Sheet_1.pdf]

## Supplementary Material

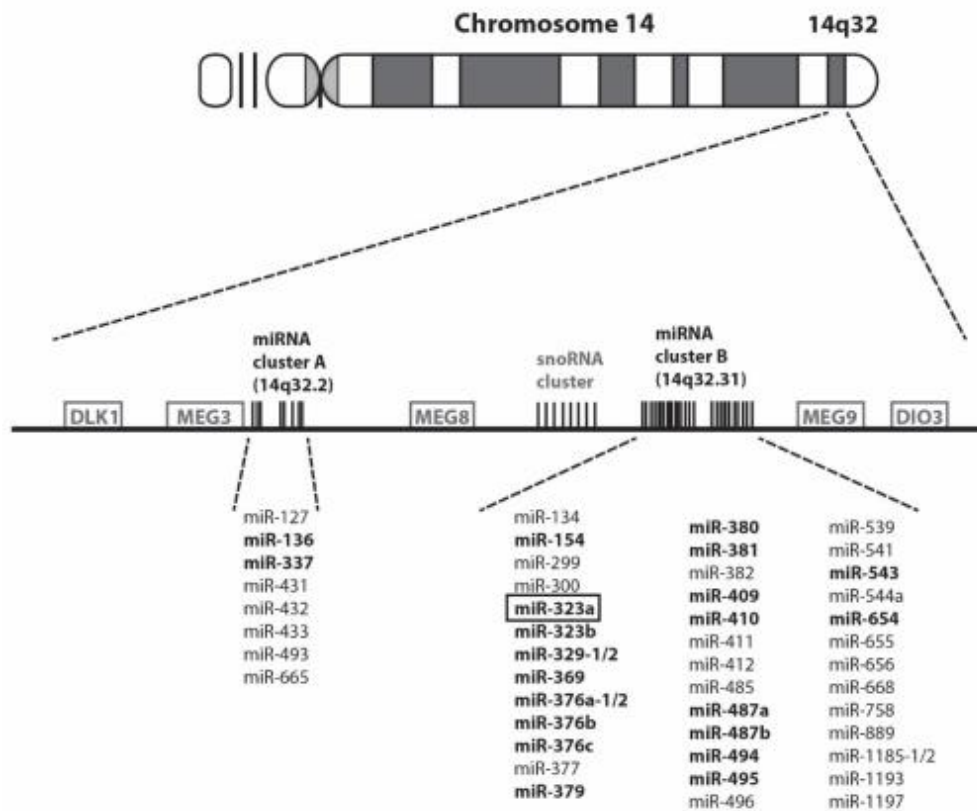

**Supplementary figure S1: *MIR-323a*, located on chromosome 14q32, is differentially expressed in neuroblastoma cell line pairs.** The miRNAs located on chromosome 14q32 region are upregulated or downregulated (bold type) in neuroblastoma cell line pairs. The miRNA of interest, *miR-323a*, is highlighted in rectangular box. MEG, Maternally expressed; SnoRNA, Small nucleolar RNAs; DLK1, Delta like non-canonical notch ligand 1; DIO3, Iodothyronine deiodinase 3; miR, microRNA.

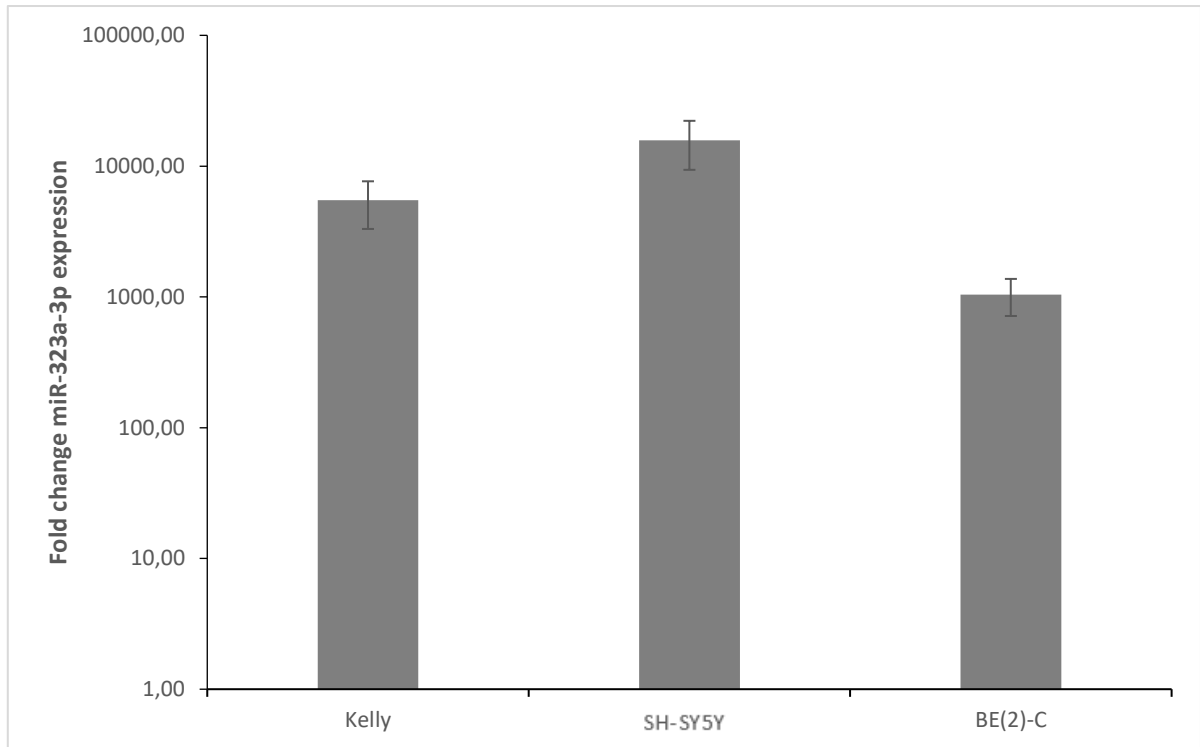

**Supplementary figure S2: Transfection efficiency of *miR-323a-3p* in neuroblastoma cells.** RT-qPCR analysis for confirmation of *miR-323a-3p* overexpression in Kelly, SH-SY5Y and BE(2)-C cell lines transfected with NC or *miR-323a-3p*. The expression of *miR-323a-3p* in NC transfected cells was set to 1 and *miR-4286* served as an endogenous control for miRNAs. Data are presented in log scale as mean  $\pm$  SD of two independent experiments, each repeated in triplicates.

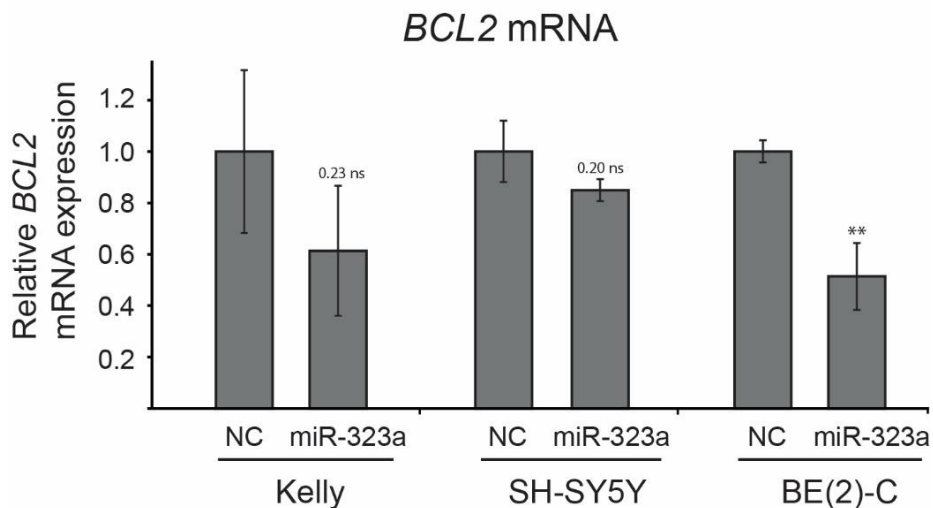

**Supplementary figure S3: The RT-qPCR analysis of *BCL2* mRNA levels in Kelly, SH-SY5Y and BE(2)-C cell lines transfected with *miR-323a-3p*.** Data is presented as mean  $\pm$  SEM of three independent experiments, each repeated in triplicates. \*\* $P < 0.01$  vs. the NC. RT-qPCR, reverse transcription-quantitative polymerase chain reaction; ns, non-significant; SD, standard deviation; miR, microRNA; NC, negative control; BCL2, B-cell lymphoma 2.

**A**

| miRNA           | Gene   | Gene description                                   | Pred. | Valid. | Refs.  |
|-----------------|--------|----------------------------------------------------|-------|--------|--------|
| hsa-miR-323a-3p | BMP1   | Bone morphogenetic protein 1                       | X     |        | miRDB  |
| hsa-miR-323a-3p | BMP3   | Bone morphogenetic protein 3                       | X     |        | miRDB  |
| hsa-miR-323a-3p | BRI3   | Brain protein I3                                   |       | X      | (1, 2) |
| hsa-miR-323a-3p | CDK6   | Cyclin dependent kinase 6                          |       | X      | (2)    |
| hsa-miR-323a-3p | CDKN1B | Cyclin dependent kinase inhibitor 1B               | X     |        | miRDB  |
| hsa-miR-323a-3p | CDK19  | Cyclin dependent kinase 19                         | X     |        | miRDB  |
| hsa-miR-323a-3p | SMAD2  | SMAD family member 2                               |       | X      | (3-5)  |
| hsa-miR-323a-3p | SMAD3  | SMAD family member 3                               |       | X      | (4, 5) |
| hsa-miR-323a-3p | SMAD5  | SMAD family member 5                               | X     |        | miRDB  |
| hsa-miR-323a-3p | TGFA   | Transforming growth factor alpha                   |       | X      | (3)    |
| hsa-miR-323a-3p | TGFB2  | Transforming growth factor beta 2                  | X     |        | miRDB  |
| hsa-miR-323a-3p | STAT3  | Signal transducer and activator of transcription 3 | X     |        | miRDB  |

Abbreviations: Pred., predicted; Valid., validated; Refs., references

**B**

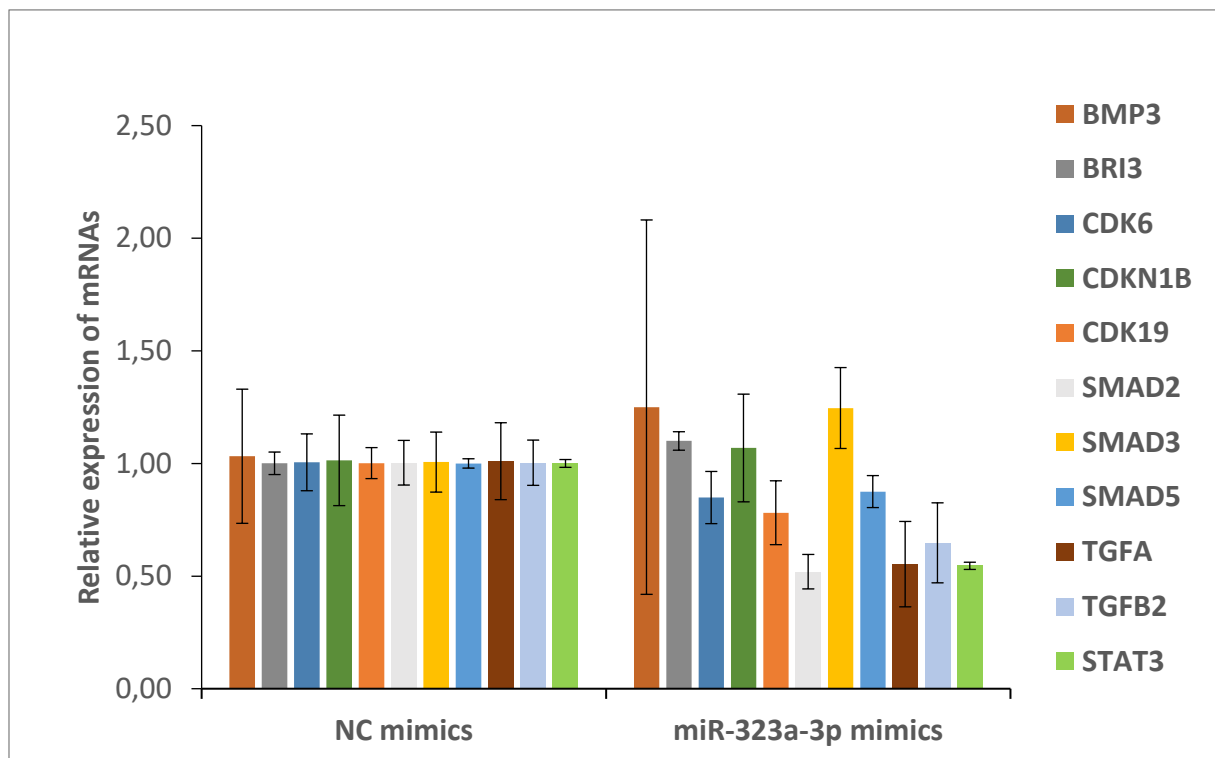

**Supplementary figure S4: Screening of selected *miR-323a-3p* targets in the cell line Kelly.** A) Selected list of predicted or validated (as direct targets by luciferase 3'UTR assay) targets of *miR-323a-3p*. B) RT-qPCR analysis for screening of *miR-323a-3p* targets in Kelly cell line transfected with NC or *miR-323a-3p* mimics. The expression of *miR-323a-3p* in NC transfected cells was set to 1 and *miR-4286* served as an endogenous control for miRNAs. Data are presented as mean  $\pm$  SD of each experiment repeated in triplicates.

#### References for Supplementary Figure S4

1. Yang L, Xiong Y, Hu X-F, Du Y-H. MicroRNA-323 regulates ischemia/reperfusion injury-induced neuronal cell death by targeting BRI3. *International journal of clinical and experimental pathology*. 2015;8(9):10725-33.
2. Zhang H, Wang X, Chen X. Potential Role of Long Non-Coding RNA ANRIL in Pediatric Medulloblastoma Through Promotion on Proliferation and Migration by Targeting miR-323. *Journal of Cellular Biochemistry*. 2017;118(12):4735-44.
3. Ge L, Habel DM, Hansbro PM, Kim RY, Gharib SA, Edelman JD, et al. miR-323a-3p regulates lung fibrosis by targeting multiple profibrotic pathways. *JCI insight*. 2016;1(20):e90301-e.
4. Kärner J, Wawrzyniak M, Tankov S, Runnel T, Aints A, Kisand K, et al. Increased microRNA-323-3p in IL-22/IL-17-producing T cells and asthma: a role in the regulation of the TGF- $\beta$  pathway and IL-22 production. *Allergy*. 2017;72(1):55-65.
5. Wang C, Liu P, Wu H, Cui P, Li Y, Liu Y, et al. MicroRNA-323-3p inhibits cell invasion and metastasis in pancreatic ductal adenocarcinoma via direct suppression of SMAD2 and SMAD3. *Oncotarget*. 2016;7(12):14912-24.
